# Supplementary material for: A computed tomography (CT)-derived radiomics approach for predicting primary co-mutations involving TP53 and epidermal growth factor receptor (EGFR) in patients with advanced lung adenocarcinomas (LUAD)
Source: PubMed Central journal article supplement — Ann Transl Med. 2021 Apr;9(7):545. doi: 10.21037/atm-20-6473 (PMC8105857; doi:10.21037/atm-20-6473), 2021-04
Supplement: atm-09-07-545-supplementary.pdf [file atm-09-07-545-supplementary.pdf]

**Table S1** Hyperparameters of SVM for base binary classifiers among the four models

| Model            | <i>EGFR<sup>+</sup> &amp; TP53<sup>+</sup> vs. EGFR<sup>+</sup> &amp; TP53<sup>-</sup></i> |     | <i>EGFR<sup>+</sup> &amp; TP53<sup>+</sup> vs. EGFR<sup>-</sup></i> |     | <i>EGFR<sup>+</sup> &amp; TP53<sup>-</sup> vs. EGFR<sup>-</sup></i> |     |
|------------------|--------------------------------------------------------------------------------------------|-----|---------------------------------------------------------------------|-----|---------------------------------------------------------------------|-----|
|                  | Gamma                                                                                      | C   | Gamma                                                               | C   | Gamma                                                               | C   |
| Clinical model   | 0.0001                                                                                     | 1   | 0.001                                                               | 100 | 0.0001                                                              | 100 |
| Semantic model   | 0.01                                                                                       | 10  | 0.0001                                                              | 10  | 0.01                                                                | 100 |
| Radiomics model  | 0.0001                                                                                     | 100 | 0.1                                                                 | 100 | 0.0001                                                              | 100 |
| Integrated model | 0.1                                                                                        | 10  | 0.0001                                                              | 100 | 0.1                                                                 | 1   |

EGFR, epidermal growth factor receptor; SVM, support vector machine.
